# Supplementary material
Source: publisher figshare collection journal article supplement (https://future-science-group.figshare.com/ndownloader/files/33885149)
Supplement: Supplementary file 1 [file 33885149]

**Supplementary materials**

**Table 1**

Medline search terms and search strategy

| **#** | **PCC** | **Term(s)** |
| --- | --- | --- |
| 1 | Concept | Learning |
| 2 | Education |
| 3 | Skill$ |
| 4 | Training |
| 5 | Literacy |
| 6 | Confidence |
| 7 | Attitudes |
| 8 | Understanding |
| 9 |  | #1 AND #2 AND #3 AND #4 AND #5 AND #6 AND #7 AND #8 |
| 10 | Population 1 | Physician$ |
| 11 | Nurse$ |
| 12 | “Health professional$” |
| 13 | Doctor$ |
| 14 | Specialist$ |
| 15 | Clinician$ |
| 16 |  | #10 AND #11 AND #12 AND #13 AND #14 AND #15 |
| 17 | Context 1 | Cancer |
| 18 | Oncology |
| 19 | Somatic |
| 20 | Tumour |
| 21 |  | #17 AND #18 AND #19 AND #20 |
| 22 | Context 2 | Genetic$ |
| 23 | Genomic$ |
| 24 | “Genetic testing” |
| 25 | “Genomic testing” |
| 26 | “Clinical genomics” |
| 27 | “Cancer genomics” |
| 28 | “Precision medicine” |
| 29 |  | #22 AND #23 AND #24 AND #25 AND #26 AND #27 AND #28 |
| 30 | ADJ limit | ((learning or education or skill$ or training or literacy or confidence or attitude$ or understanding) adj10 (physician$ or nurse$ or "health professional$" or doctor$ or specialist$ or clinician$)).ab,kw,ti. |
| 31 |  | #30 AND #21 AND #29 |
| 32 | Limits: English; 2010 | #31 |
